# Supplementary material
Source: publisher site journal article supplement (https://www.dovepress.com/article/321071)
Supplement: Supplementary file 1 [file get_supplementary_file.php]

**Supporting information**





Figure S1 Synthesis pathway of DPSE-PEG2k-iRGD.


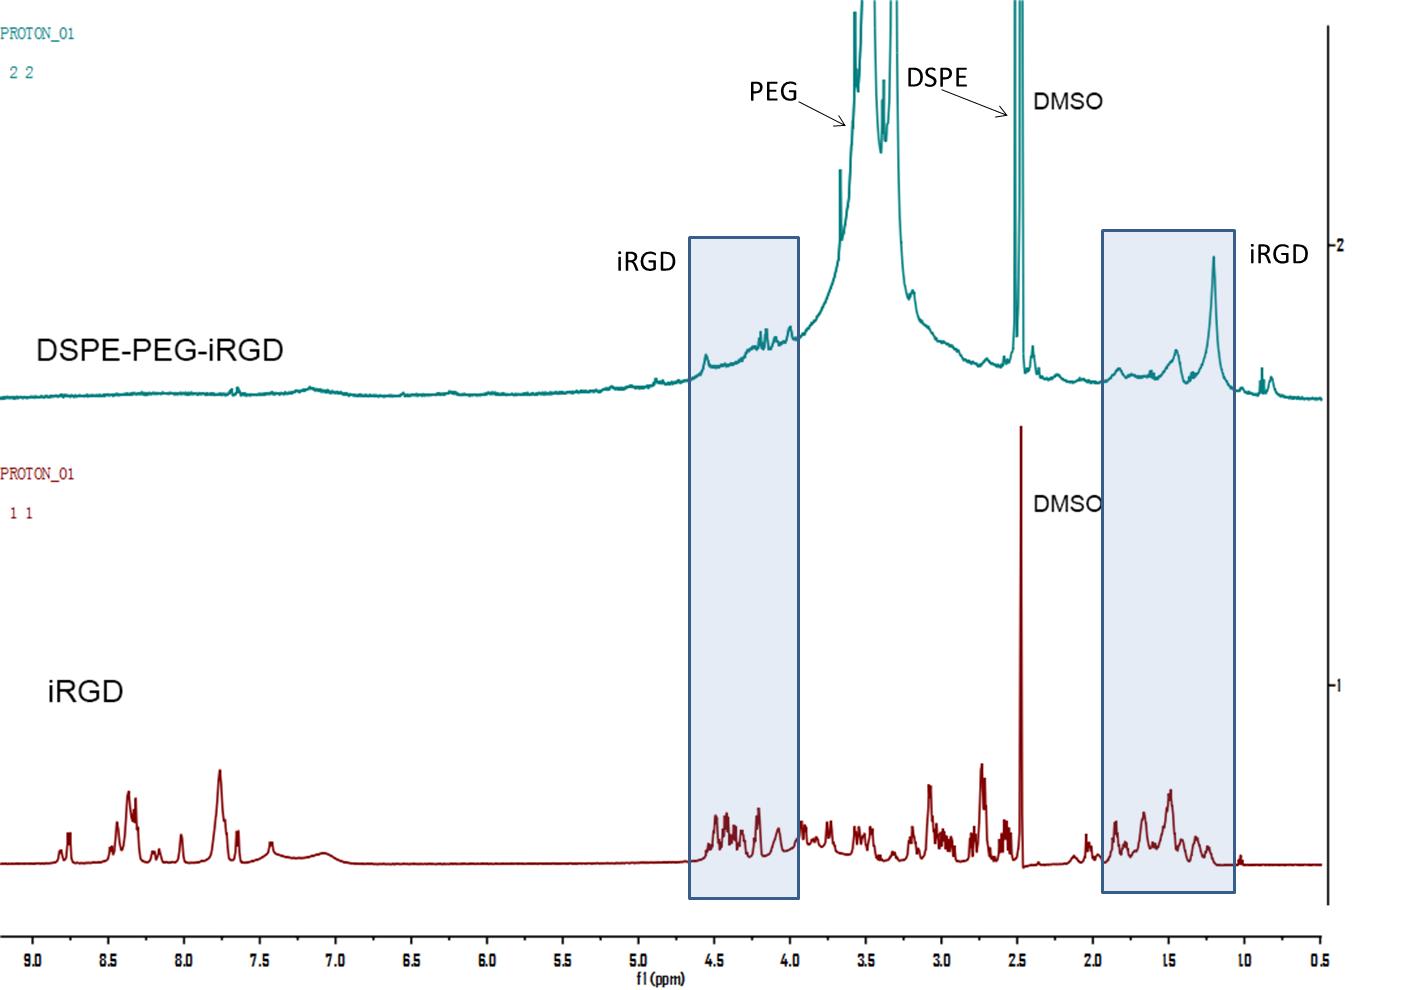


Figure S2 1H-NMR spectra of DPSE-PEG-iRGD and iRGD.


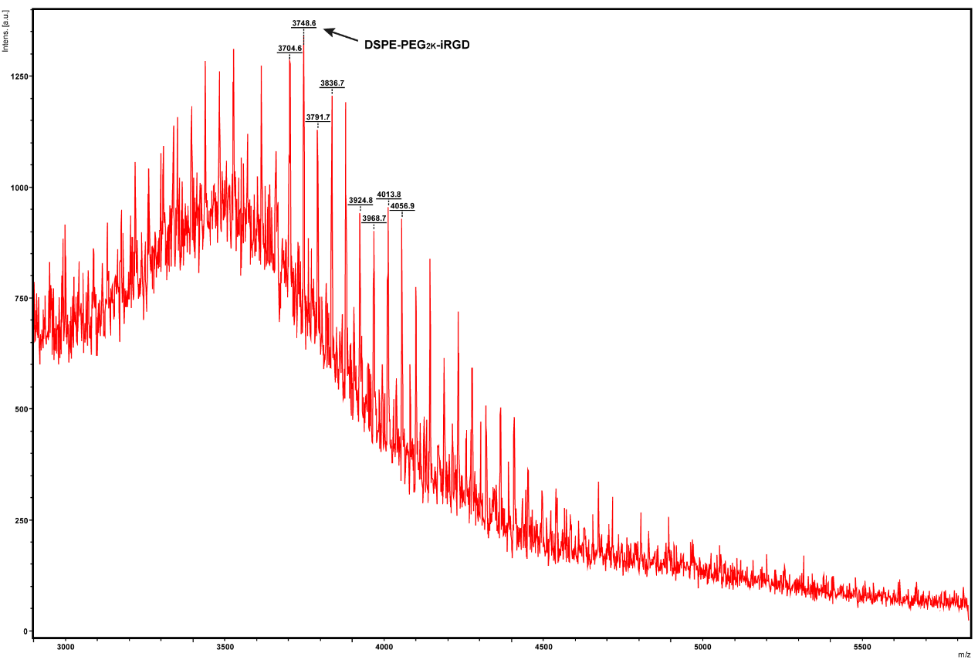


Figure S3 MALDI-TOF spectra of DPSE-PEG-iRGD.





Figure S4 The insertion amount and efficiency of DPSE-PEG-iRGD into RM.


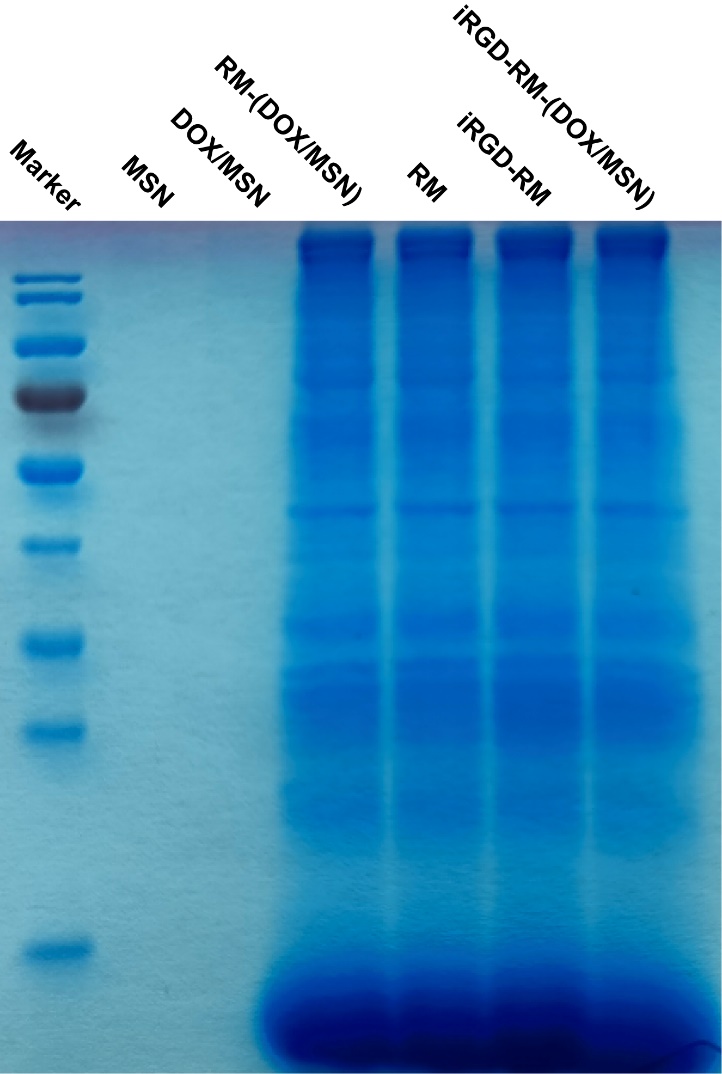


Figure S5 The composition of proteins on the surface of nanoparticles by SDS-PAGE.


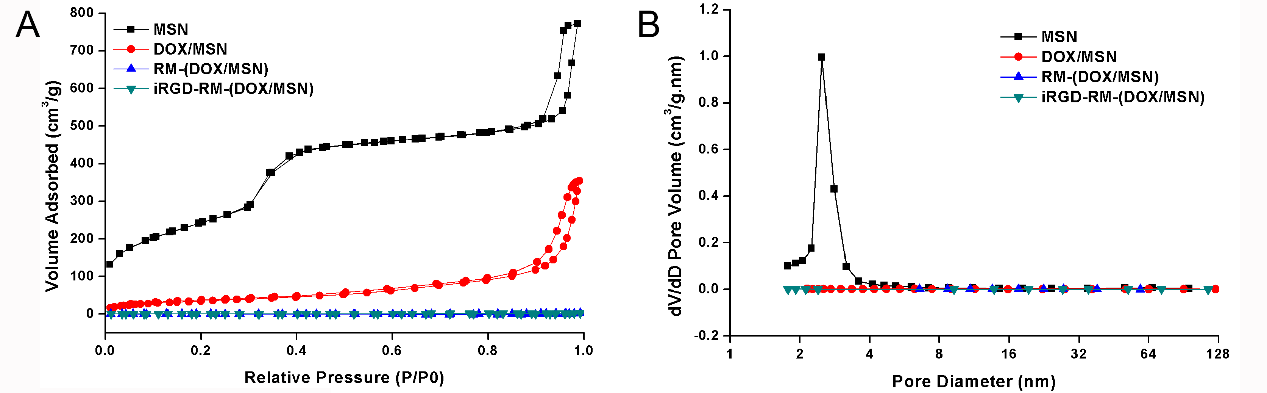


Figure S6 Characterization of RM-(DOX/MSN) and iRGD-RM-(DOX/MSN). (A) N2 adsorption/desorption isotherm curves and (B) pore diameter.





Figure S7 Adsorption of plasma proteins by MSN, RM-MSN and iRGD-RM-MSN.


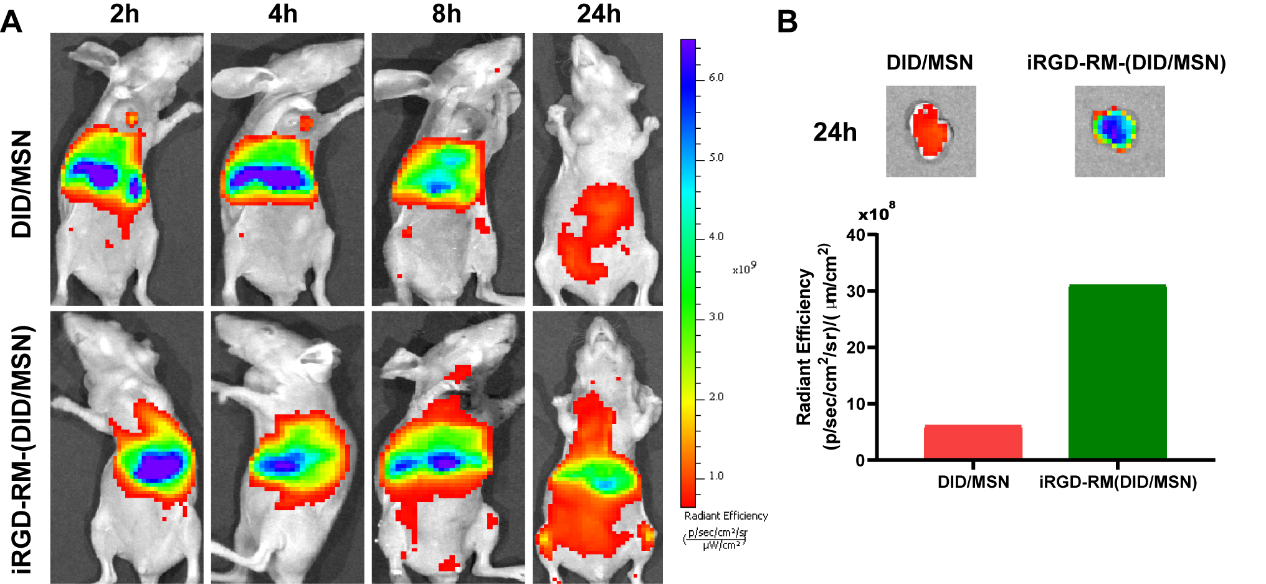


Figure S8 In vivo fluorescence imaging of various formulations in mice. (A) Whole body images of the tumor-bearing mice. (B) Fluorescence images of the excised tumors at 24 h post-injection of the formulations.


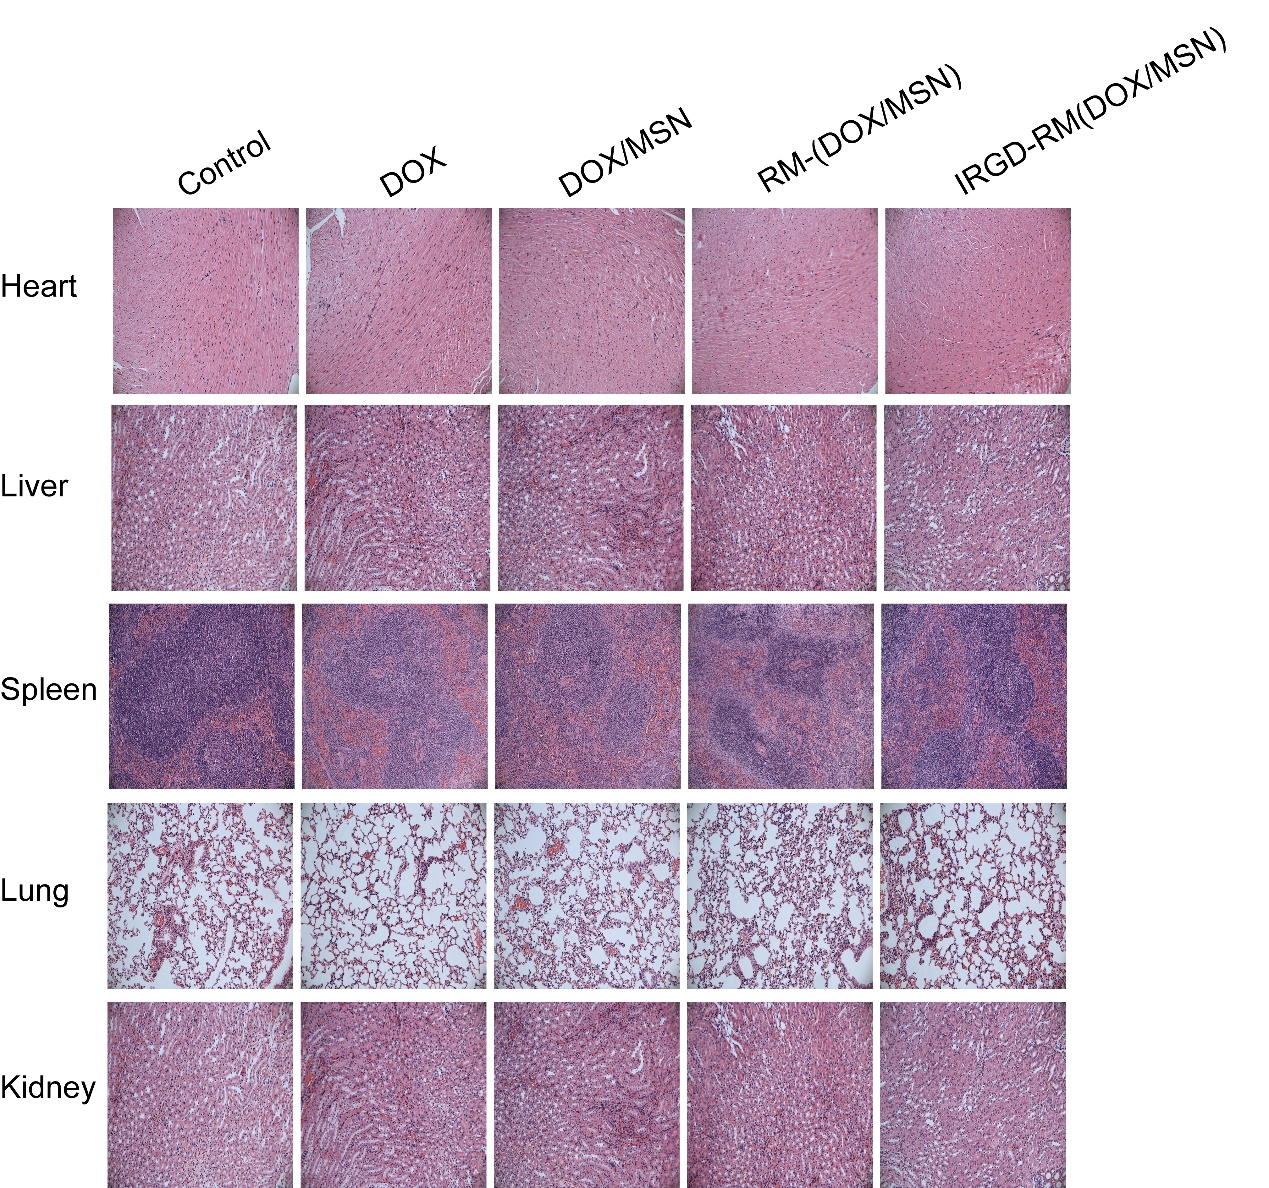


Figure S9 H&E staining of the heart, liver, spleen, lung and kidney after treatment with different nanoparticle formulations.
